# Supplementary material
Source: MDPI journal article supplement (https://www.mdpi.com/2073-4344/8/3/105)
Supplement: s1 [file s1]

Supplementary materials: Synthesis of Tetrahydropyran from Tetrahydrofurfuryl Alcohol over Cu–Zno/Al2O3 under a Gaseous-Phase Condition

Fengyuan Zhang 1,2,3, Bin Zhang 4, Xincheng Wang 1,2, Long Huang 1,2,*, Dekun Ji 1,2,
Songsong Du 1,3, Lei Ma 1,2 and Shijing Lin 1,2

Grignard Reaction

The solvent 2-methyl tetrahydrofuran (2-MeTHF) can provide a cost-effective, green alternative to tetrahydrofuran (THF). 2-MeTHF’s advantages include its origin from renewable and price stable resources as well as beneﬁcial physical and chemical properties, thus can provide increased yields at reduced costs. The 2-MeTHF is currently produced by Penn A Kem a high-tech Specialty Chemical Company and Qingquan Chemical all over the world. However, in this work, the THP being produced from THFA can provide more cost-effective, green alternative to 2-MeTHF. The boiling point of THP is 88 oC, the wide temperature range speeds up some inert reaction, and reaction can be done more quickly.

Therefore, we chose grignard reaction of the bromobenzene and diphenyl ketone to produce [trityl](D://program/Youdao/Dict/6.3.69.7015/resultui/frame/javascript:void(0);) [alcohol](D://program/Youdao/Dict/6.3.69.7015/resultui/frame/javascript:void(0);) (**Scheme S1**). In order to certify the THP as solvent in grignard reaction, we can obtain better experiment result than THF or closer yield. **Table S1** shows the comparison of results when THF and THP as the solvent in the grignard reaction. From **Table S1**, it was showed that the reaction temperatures could be promoted by using THP. Compared with THF solvent, the yield of product was higher; besides, the purity of THP was good and the solvent was easy to recycle. Therefore, we can save the production cost and keep in line with the green chemistry rules.

| **Solvent** | **Reaction temperature(℃)** | **The consumption of magnesium(g)** | **yield** |
| --- | --- | --- | --- |
| THF | 65 | 0.5 | 82.8% |
| THP | 65 | 0.5 | 77.5% |
| THP | 85 | 0.4 | 88.8% |
| THF | 60 | 0.5 | 93.3% |
| THP | 60 | 0.5 | 77.0% |

**Table S1.** the comparison of results THF and THP as solvent

**Scheme S1.** Synthetic route of triphenyl methanol.

**Figure S1.** Particle volume-size distribution of the Cu-ZnO/Al2O3 catalysts.

**Figure S2.** N2 physisorption isotherm of the Cu-ZnO/Al2O3 catalysts

**Figure S3.** NH3-TPD patterns of Cu-ZnO/Al2O3 catalysts with different γ-Al2O3
